# Supplementary material for: Culturable Bacterial Endophytes of Wild White Poplar (Populus alba L.) Roots: A First Insight into Their Plant Growth-Stimulating and Bioaugmentation Potential
Source: MDPI journal article supplement (doi:10.3390/biology12121519), 2023-12-12
Supplement: s1 [file s1]

**Supplementary Table S1.** Results of pairwise comparisons of genomes of s4, s23 and closest type strains (TYGS)

| Query strain | Subject strain                               | dDDH (d0, in %) | C.I. (d0, in %) | dDDH (d4, in %) | C.I. (d4, in %) | dDDH (d6, in %) | C.I. (d6, in %) | G+C content difference (in %) |
|--------------|----------------------------------------------|-----------------|-----------------|-----------------|-----------------|-----------------|-----------------|-------------------------------|
| 's23'        | <i>Peribacillus frigoritolerans</i> DSM 8801 | 87.4            | [83.9 - 90.3]   | 89.3            | [86.9 - 91.3]   | 90.5            | [87.8 - 92.6]   | 0.47                          |
| 's4'         | <i>Peribacillus castrilensis</i> N3          | 79.4            | [75.5 - 82.9]   | 84.5            | [81.7 - 86.9]   | 83.2            | [79.9 - 86.1]   | 0.32                          |
| 's23'        | <i>Peribacillus castrilensis</i> N3          | 77              | [73.1 - 80.6]   | 75.6            | [72.6 - 78.4]   | 79.6            | [76.2 - 82.7]   | 0.1                           |
| 's4'         | 's23.fa'                                     | 76.2            | [72.2 - 79.8]   | 75.2            | [72.2 - 78.0]   | 78.8            | [75.4 - 81.9]   | 0.43                          |
| 's4'         | <i>Peribacillus frigoritolerans</i> DSM 8801 | 79.5            | [75.6 - 83.0]   | 74.7            | [71.7 - 77.5]   | 81.6            | [78.2 - 84.5]   | 0.04                          |
| 's23'        | <i>Bacillus cereus</i> ATCC 14579            | 13.2            | [10.5 - 16.5]   | 53              | [50.3 - 55.6]   | 13.7            | [11.3 - 16.5]   | 4.88                          |
| 's4'         | <i>Peribacillus simplex</i> NBRC 15720       | 68.8            | [64.9 - 72.4]   | 52.6            | [49.9 - 55.2]   | 67.1            | [63.7 - 70.4]   | 0.79                          |
| 's23'        | <i>Peribacillus simplex</i> NBRC 15720       | 65.2            | [61.4 - 68.9]   | 51.8            | [49.1 - 54.5]   | 63.9            | [60.5 - 67.1]   | 0.36                          |
| 's23'        | <i>Bacillus thuringiensis</i> ATCC 10792     | 13.1            | [10.4 - 16.4]   | 47.7            | [45.1 - 50.3]   | 13.5            | [11.2 - 16.3]   | 5.34                          |

**Supplementary Table S2.** Results of pairwise comparisons of genomes of s9 strain and closest type strains (TYGS)

| Query strain | Subject strain                             | dDDH (d0, in %) | C.I. (d0, in %) | dDDH (d4, in %) | C.I. (d4, in %) | dDDH (d6, in %) | C.I. (d6, in %) | G+C content difference (in %) |
|--------------|--------------------------------------------|-----------------|-----------------|-----------------|-----------------|-----------------|-----------------|-------------------------------|
| s9           | <i>Micrococcus aloeverae</i> BCRC 80870    | 81.9            | [78.0 - 85.2]   | 83.6            | [80.8 - 86.0]   | 85.1            | [82.0 - 87.8]   | 0.17                          |
| s9           | <i>Micrococcus yunnanensis</i> BCRC 80243  | 83.5            | [79.7 - 86.7]   | 82.8            | [80.0 - 85.3]   | 86.3            | [83.2 - 88.9]   | 0.23                          |
| s9           | <i>Micrococcus yunnanensis</i> DSM 21948   | 83.6            | [79.7 - 86.8]   | 82.8            | [80.0 - 85.3]   | 86.4            | [83.3 - 89.0]   | 0.07                          |
| s9           | <i>Micrococcus yunnanensis</i> DSM 24531   | 81              | [77.1 - 84.4]   | 77.9            | [75.0 - 80.7]   | 83.4            | [80.2 - 86.3]   | 0.21                          |
| s9           | <i>Micrococcus luteus</i> NCTC 2665        | 77.9            | [74.0 - 81.5]   | 74.8            | [71.8 - 77.6]   | 80.2            | [76.8 - 83.2]   | 0.17                          |
| s9           | <i>Micrococcus luteus</i> ATCC 4698        | 78.2            | [74.2 - 81.7]   | 74.7            | [71.7 - 77.5]   | 80.4            | [77.0 - 83.4]   | 0.25                          |
| s9           | <i>Ottowia caeni</i> BD-1                  | 12.8            | [10.2 - 16.1]   | 45.3            | [42.8 - 47.9]   | 13.3            | [10.9 - 16.0]   | 9.19                          |
| s9           | <i>Micrococcus endophyticus</i> BCRC 16908 | 32.4            | [29.0 - 36.0]   | 42.5            | [40.0 - 45.1]   | 32.7            | [29.8 - 35.8]   | 1.58                          |
| s9           | <i>Micrococcus endophyticus</i> DSM 17945  | 59.4            | [55.8 - 63.0]   | 32.5            | [30.1 - 35.0]   | 52.2            | [49.1 - 55.2]   | 0.74                          |

**Supplementary Table S3.** NCBI Assembly accession numbers of the genomic sequences.

| Strain | Taxonomic classification                         | Sample accession | Assembly accession |
|--------|--------------------------------------------------|------------------|--------------------|
| s2     | <i>Pseudomonas siliginis</i>                     | SAMN38245985     | JAXDEZ000000000    |
| s3     | <i>Staphylococcus haemolyticus</i>               | SAMN38245986     | JAXDEY000000000    |
| s4     | <i>Peribacillus frigoritolerans</i>              | SAMN38245987     | JAXDEX000000000    |
| s5     | <i>Corynebacterium amycolatum</i>                | SAMN38245988     | JAXDEW000000000    |
| s9     | <i>Micrococcus luteus</i>                        | SAMN38245989     | JAXDEV000000000    |
| s10    | <i>Pseudomonas canadensis</i>                    | SAMN38245990     | JAXDEU000000000    |
| s12    | <i>Kocuria rosea</i>                             | SAMN38245991     | JAXDET000000000    |
| s13    | <i>Bacillus cereus</i>                           | SAMN38245992     | JAXDES000000000    |
| s14    | <i>Bacillus bombysepticus</i> / <i>B. cereus</i> | SAMN38245993     | JAXDER000000000    |
| s15    | <i>Pseudomonas sp.</i>                           | SAMN38245994     | JAXDEQ00000000     |
| s17    | <i>Kocuria rosea</i>                             | SAMN38245995     | JAXDEP000000000    |
| s20    | <i>Pseudomonas sp.</i>                           | SAMN38245996     | JAXDEO00000000     |
| s22    | <i>Bacillus cereus</i>                           | SAMN38245997     | JAXDEN000000000    |
| s23    | <i>Peribacillus frigoritolerans</i>              | SAMN38245998     | JAXDEM000000000    |
