# Supplementary material for: Culturable Bacterial Endophytes of Wild White Poplar (Populus alba L.) Roots: A First Insight into Their Plant Growth-Stimulating and Bioaugmentation Potential
Source: MDPI journal article supplement (doi:10.3390/biology12121519), 2023-12-12
Supplement: s1 [file s1]

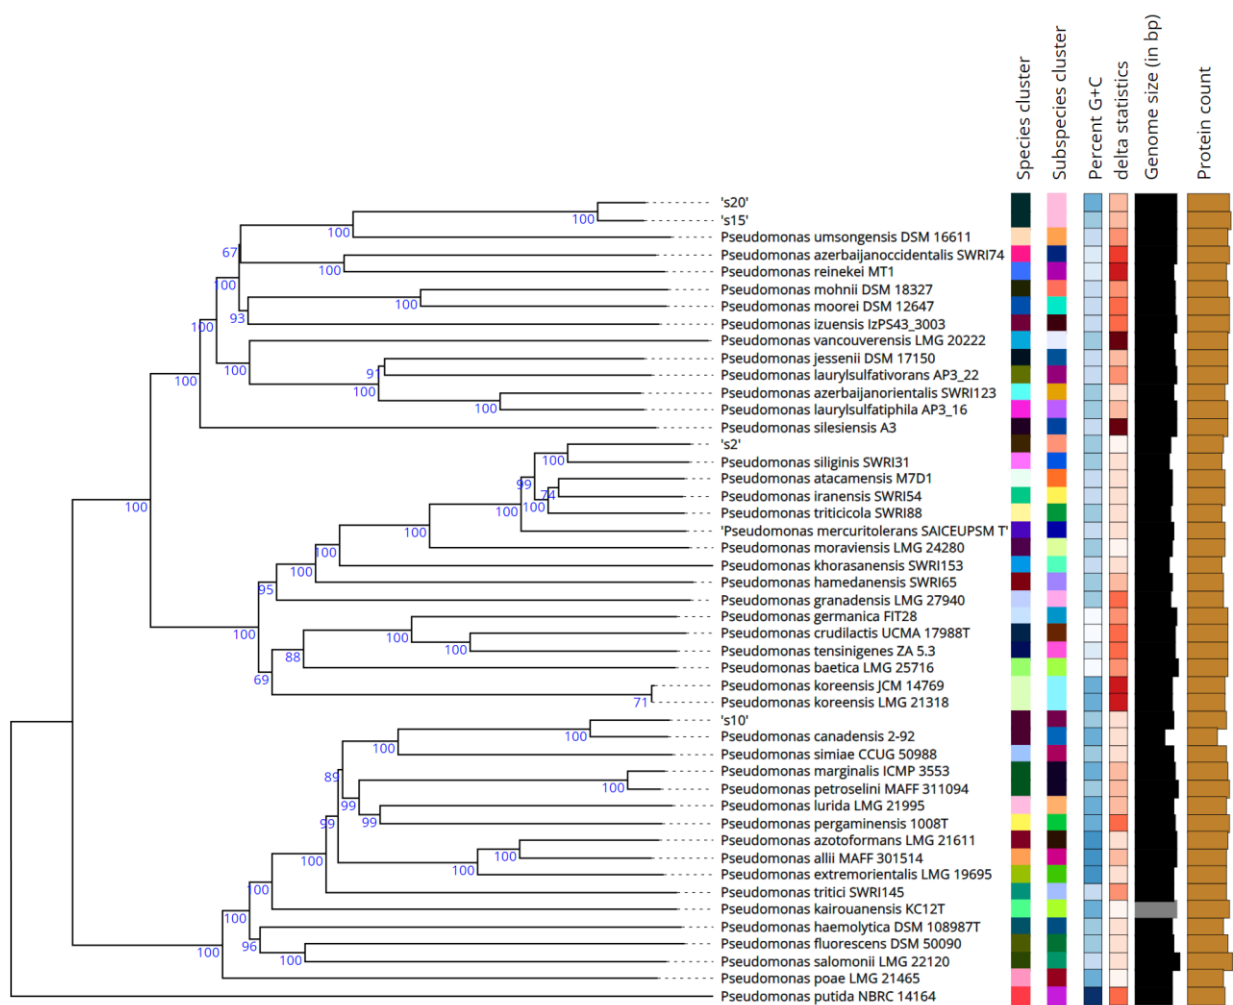

**Supplementary Figure S1.** Phylogenetic tree inferred by TYGS for type strains with highest genomic similarity scores (MASH algorithm) to s2, s10, s15, s20 strains. *P. putida*, *P. fluorescens* are added manually.

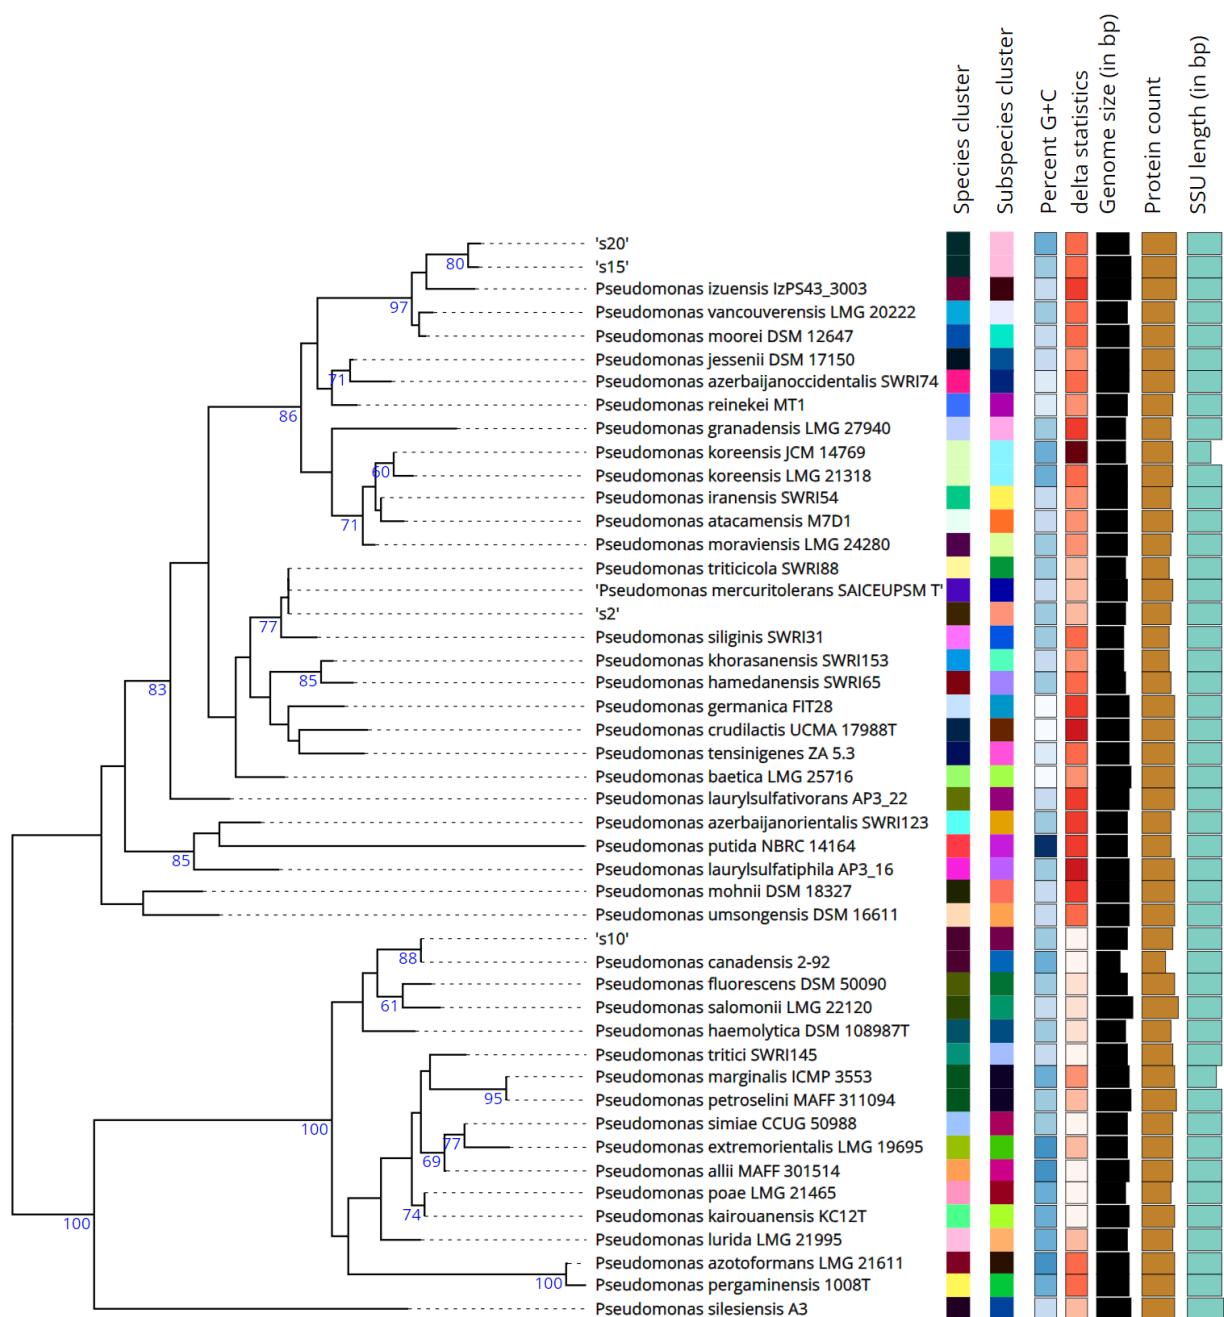

**Supplementary Figure S2.** Phylogenetic tree inferred by TYGS for type strains with highest 16S similarity scores to s2, s10, s15, s20 strains. *P. putida*, *P. fluorescens* are added manually.

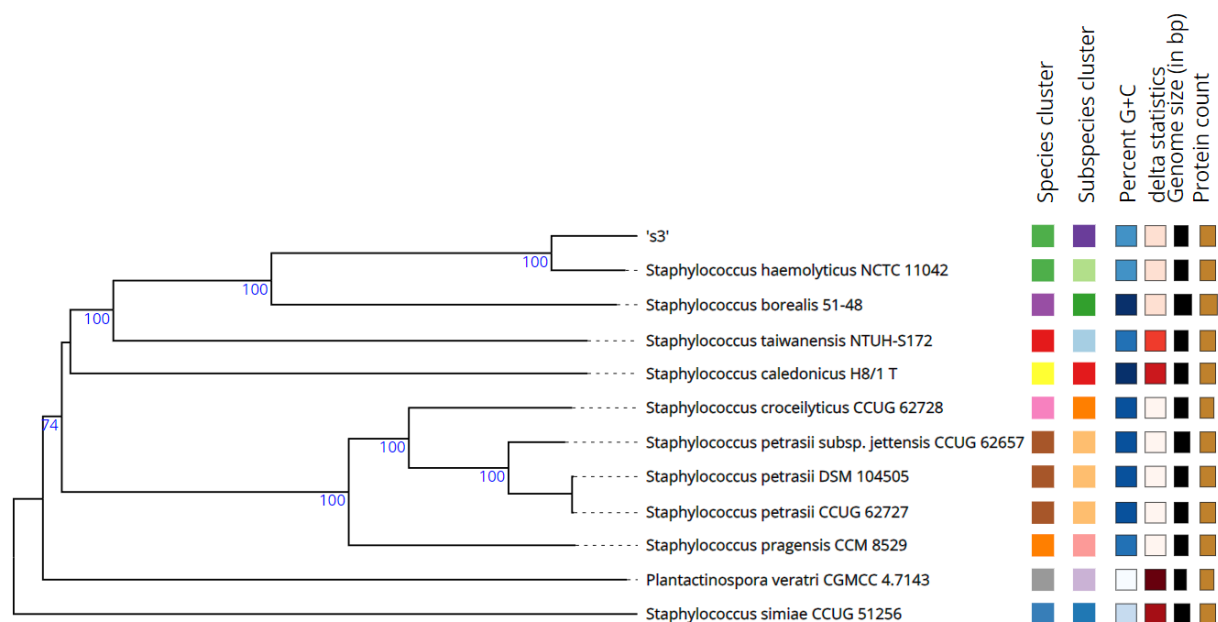

**Supplementary Figure S3.** Phylogenetic tree inferred by TYGS for type strains with highest genomic similarity scores (MASH algorithm) to s3 strain.

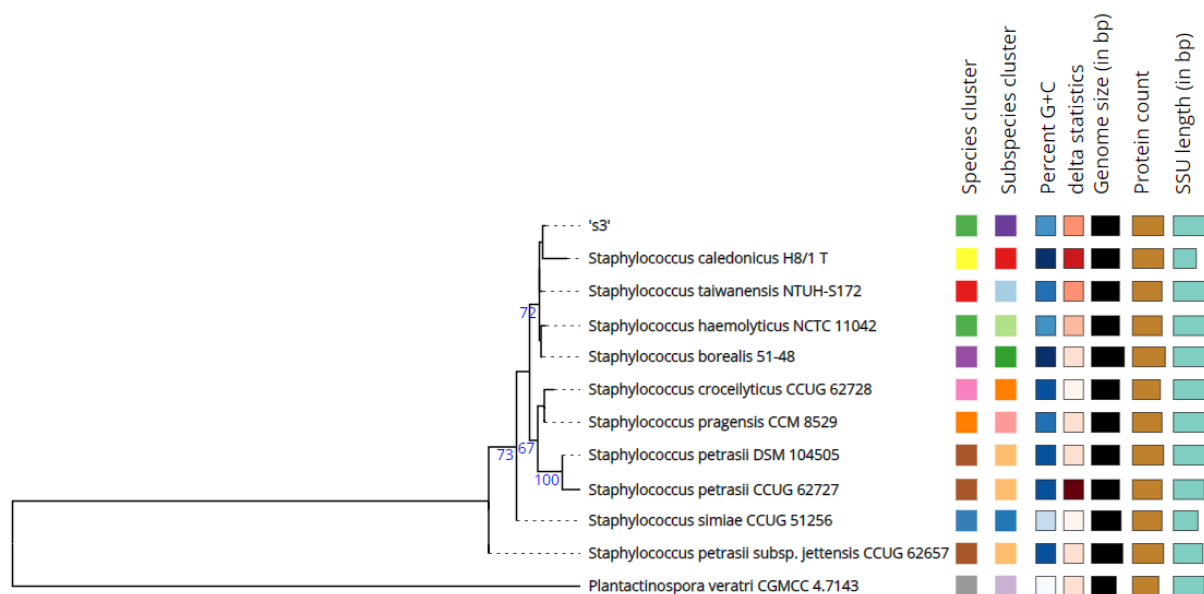

**Supplementary Figure S4.** Phylogenetic tree inferred by TYGS for type strains with highest 16S similarity scores to s3 strain.

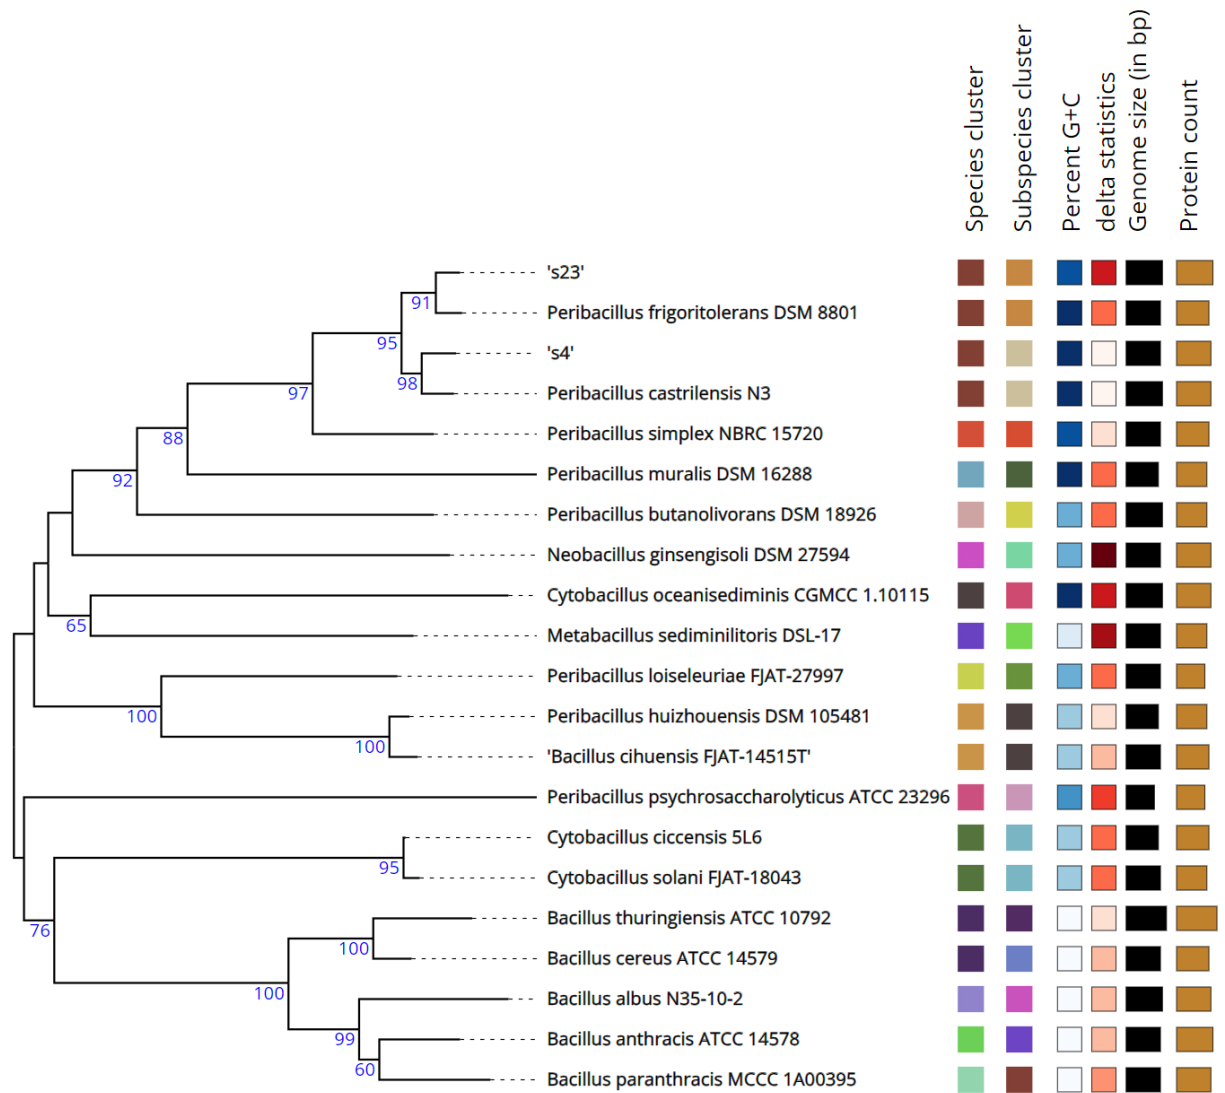

**Supplementary Figure S5.** Phylogenetic tree inferred by TYGS for type strains with highest genomic similarity scores (MASH algorithm) to s4, s23 strains.

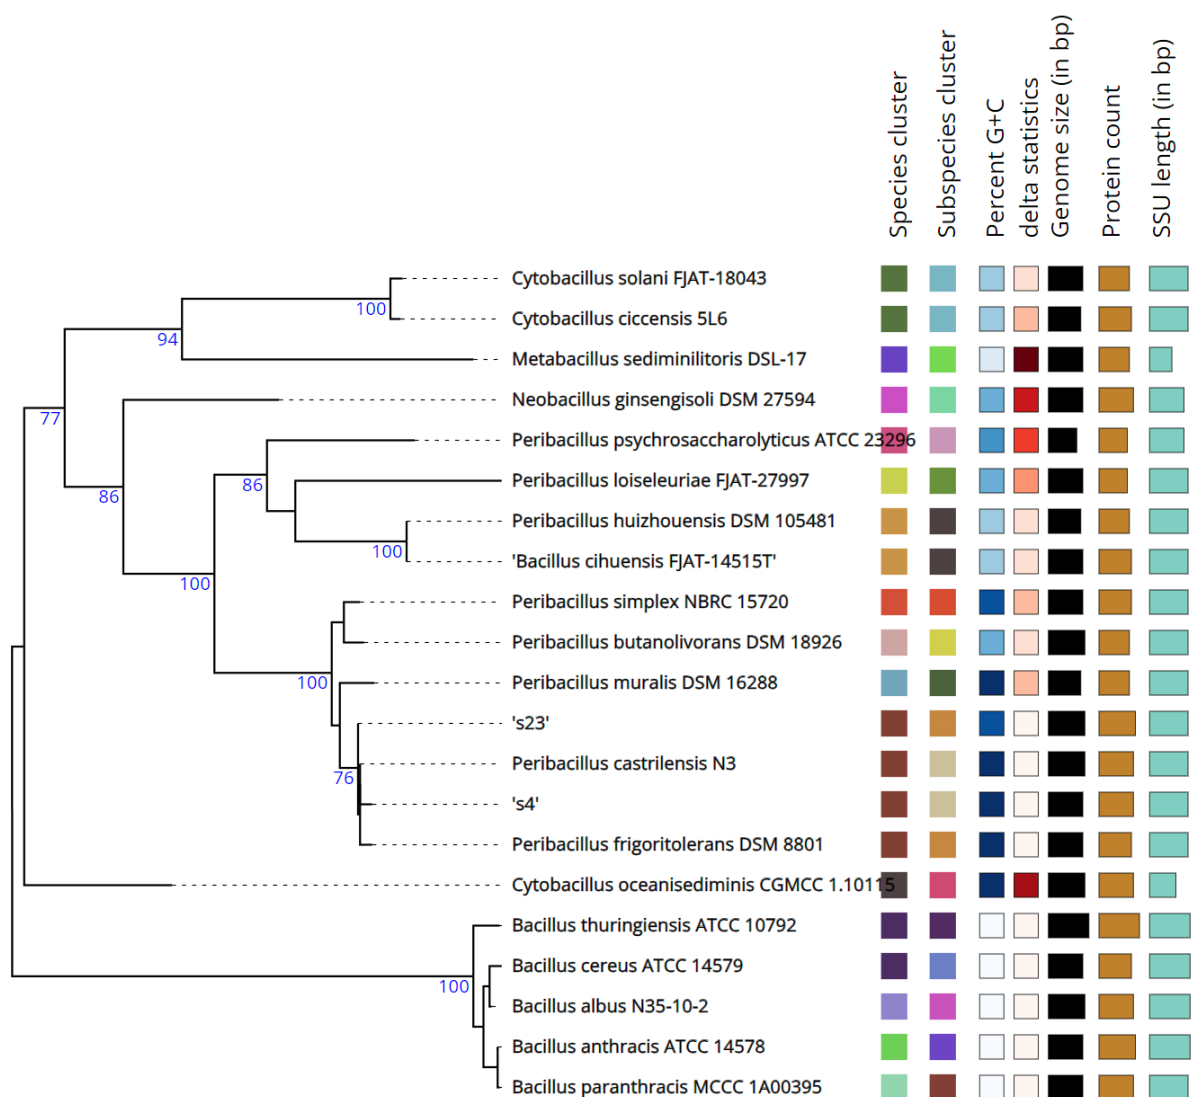

**Supplementary Figure S6.** Phylogenetic tree inferred by TYGS for type strains with highest 16S similarity scores to s4, s23 strains.

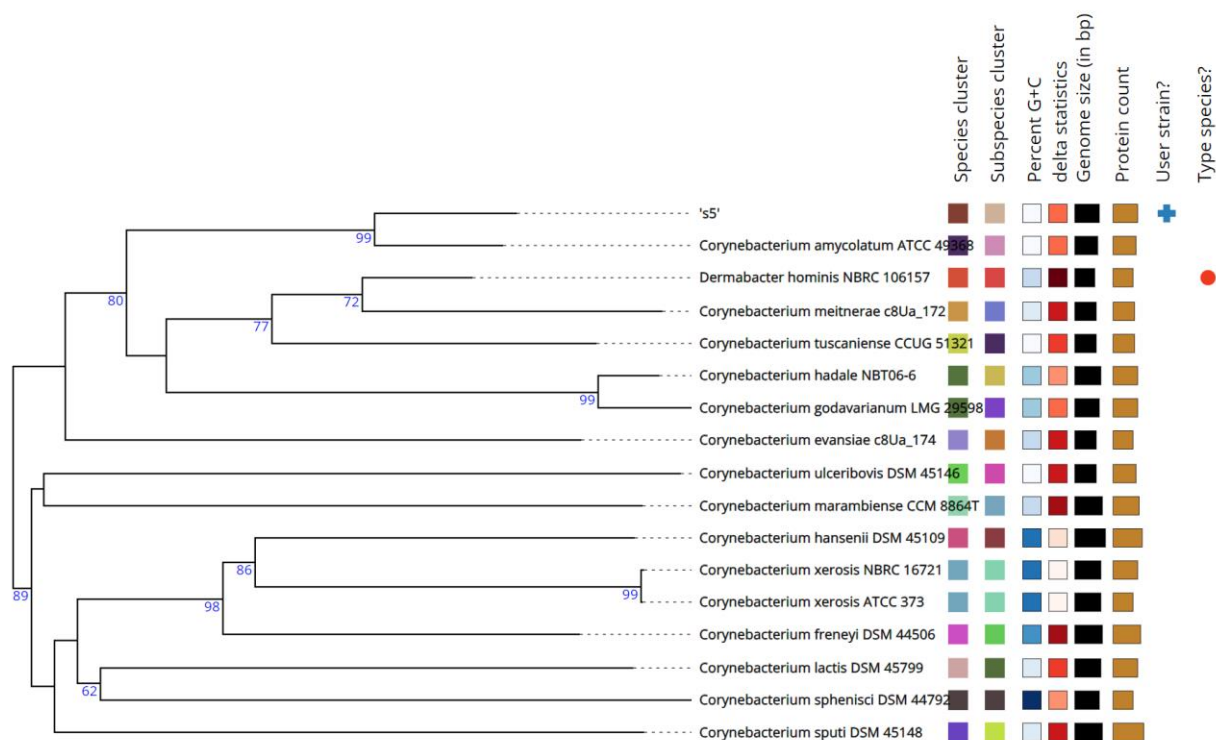

**Supplementary Figure S7.** Phylogenetic tree inferred by TYGS for type strains with highest genomic similarity scores (MASH algorithm) to s5 strain.

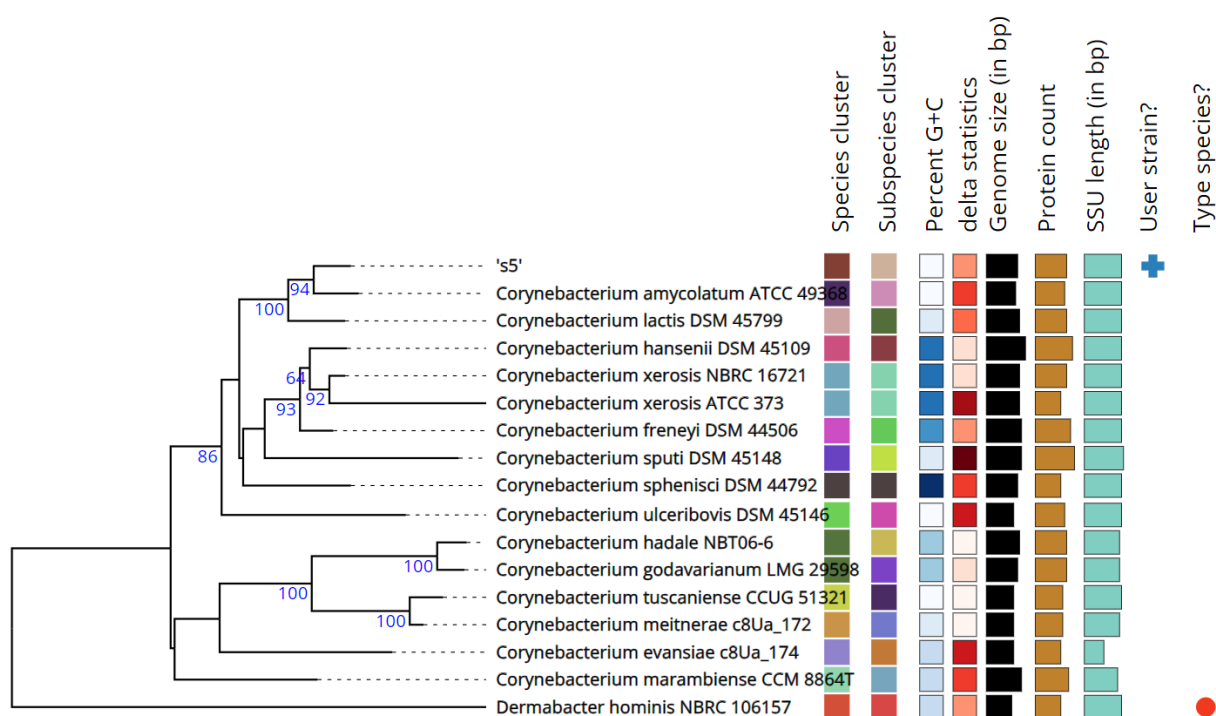

**Supplementary Figure S8.** Phylogenetic tree inferred by TYGS for type strains with highest 16S similarity scores to s5 strain.

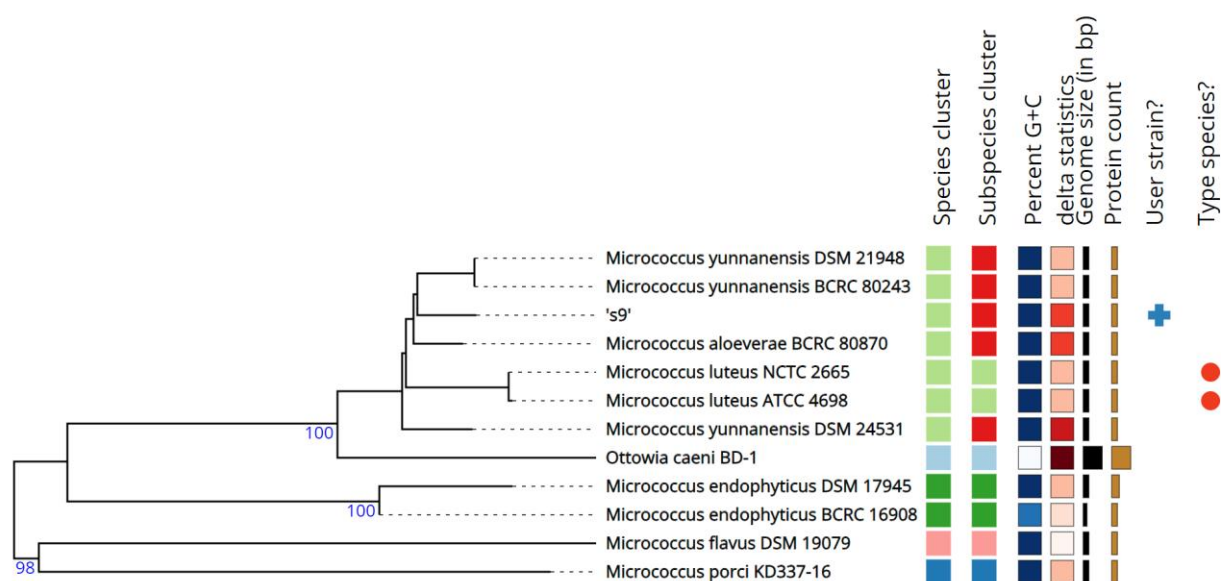

**Supplementary Figure S9.** Phylogenetic tree inferred by TYGS for type strains with highest genomic similarity scores (MASH algorithm) to s9 strain.

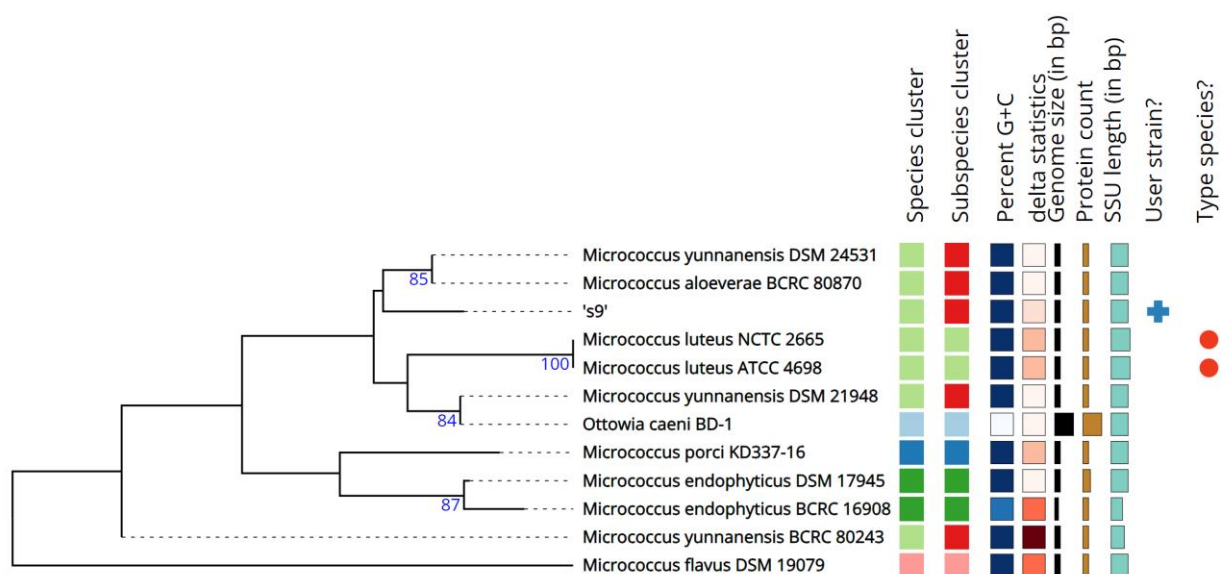

**Supplementary Figure S10.** Phylogenetic tree inferred by TYGS for type strains with highest 16S similarity scores to s9 strain.

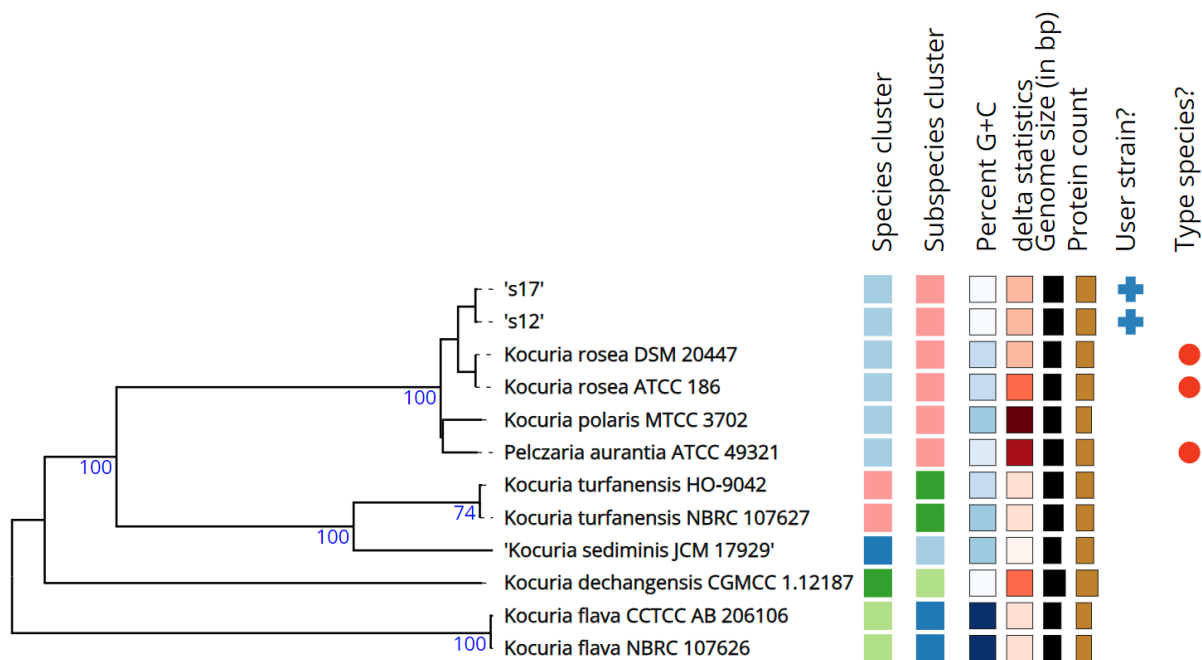

**Supplementary Figure S11.** Phylogenetic tree inferred by TYGS for type strains with highest genomic similarity scores (MASH algorithm) to s12 and s17 strains.

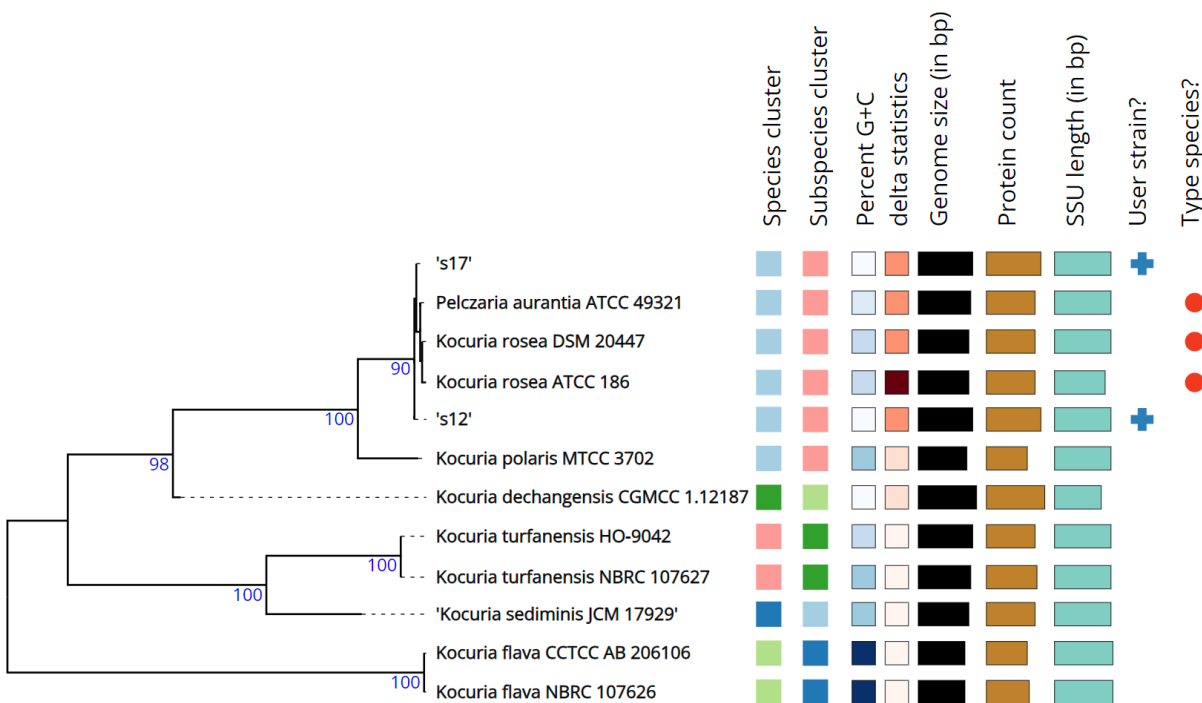

**Supplementary Figure S12.** Phylogenetic tree inferred by TYGS for type strains with highest 16S similarity scores to s12 and s17 strains.



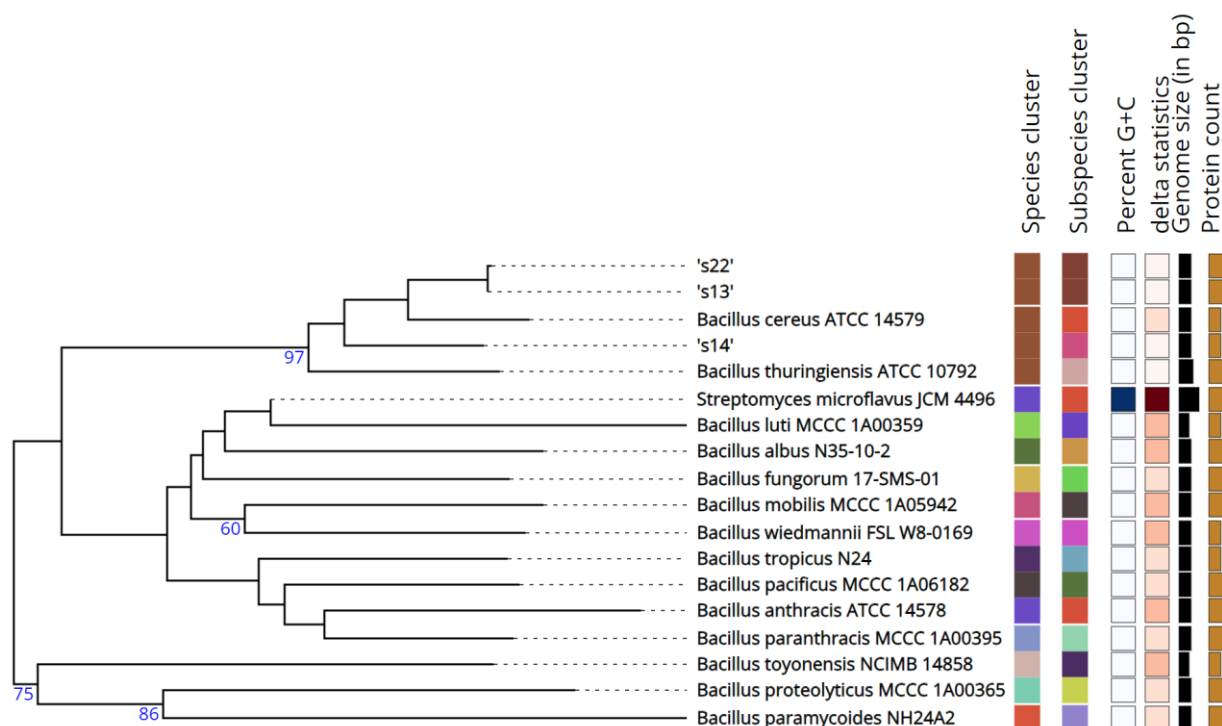

**Supplementary Figure S13.** Phylogenetic tree inferred by TYGS for type strains with highest genomic similarity scores (MASH algorithm) to s13, s14 and s22 strains.

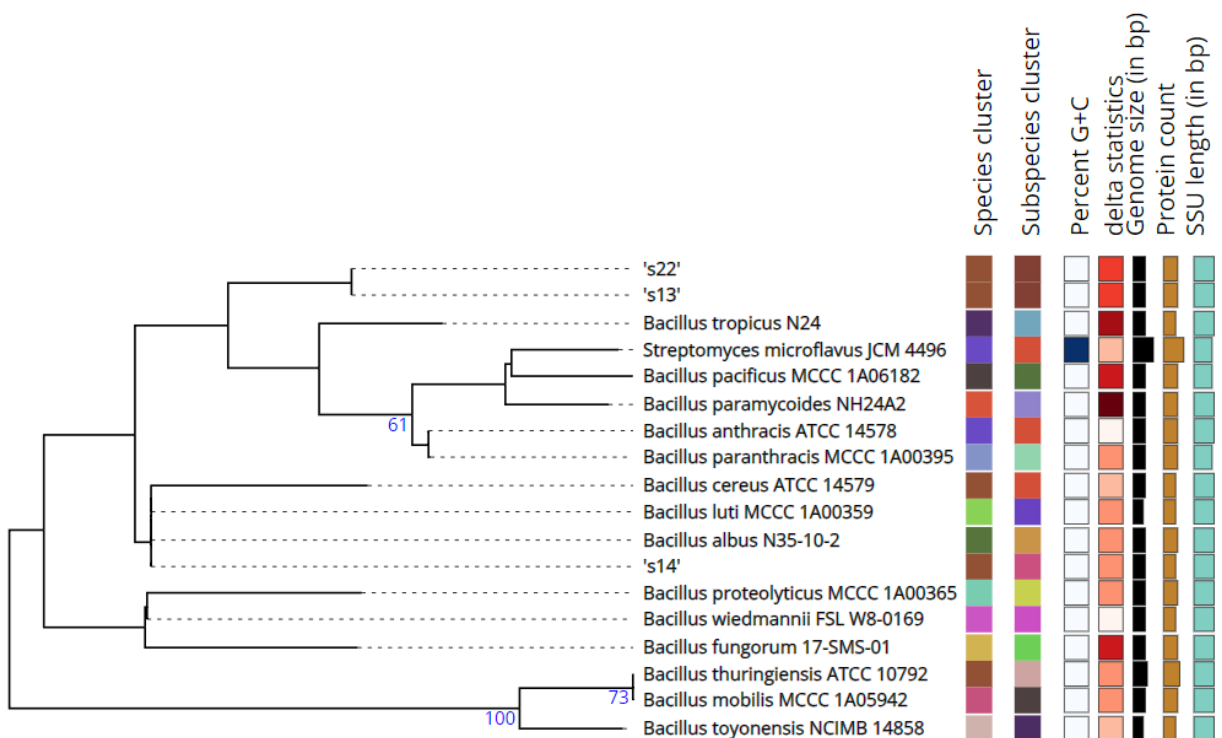

**Supplementary Figure S14.** Phylogenetic tree inferred by TYGS for type strains with highest 16S similarity scores to s13, s14 and s22 strains.
